# Supplementary material
Source: PubMed Central journal article supplement (PMC3886821)
Supplement: NIHMS512594-supplement-1.pdf [file NIHMS512594-supplement-1.pdf]

## SUPPLEMENTAL MATERIAL

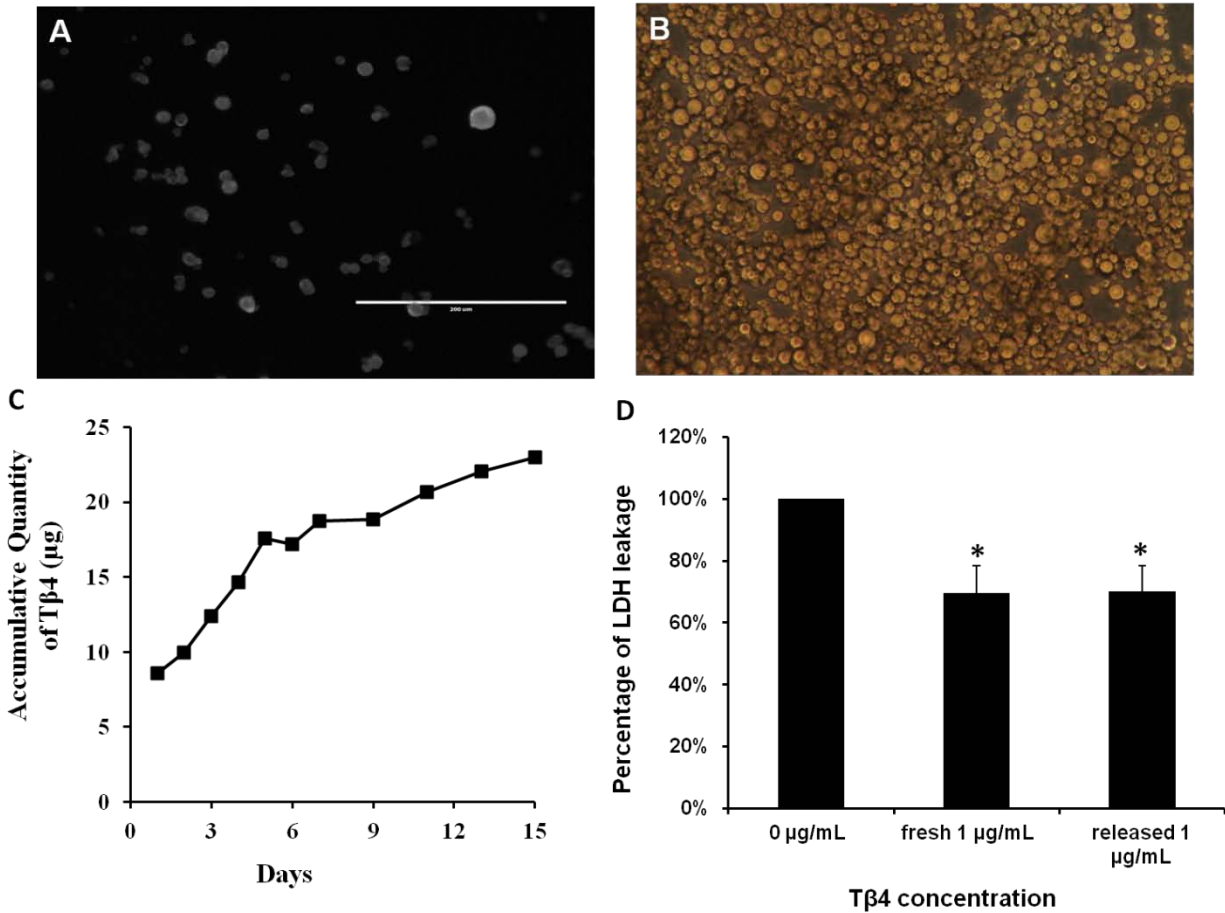

### Supplemental Figure 1. *Gelatin microspheres extend the duration of Tβ4 delivery.*

Representative images of (A) freshly manufactured and (B) cross-linked gelatin microspheres in MEM medium. (Bar=200μm). (C) The cumulative amount of Tβ4 that had been released from the microspheres into the medium was monitored for up to 15 days. (D) sMSCs were cultured under hypoxic conditions for 48 hours with 1 μg/mL of fresh Tβ4 or 1 μg/mL of Tβ4 that had been collected from the microsphere-conditioned medium, and then LDH levels in the culture medium were measured and presented as a percentage of the measurements obtained in the absence of Tβ4. (\*p<0.05 vs. 0 μg/mL).
